# Supplementary material
Source: publisher figshare collection journal article supplement (https://aacr.figshare.com/articles/dataset/_/23627578)

# Figure S3

## A

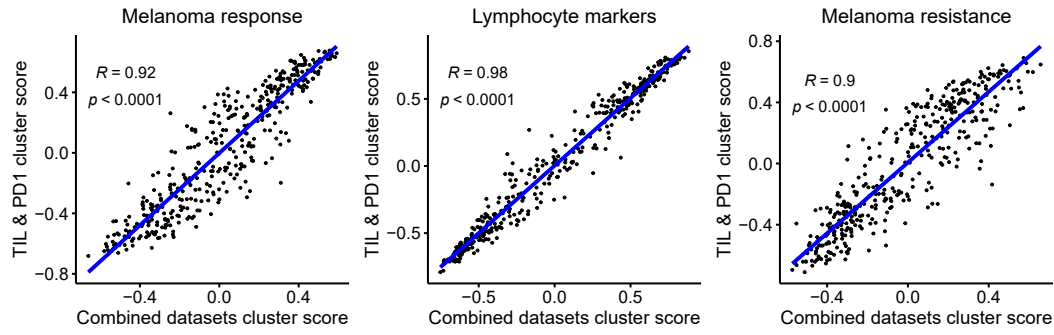

## B

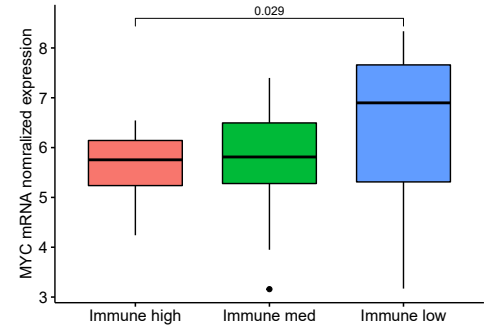

## C

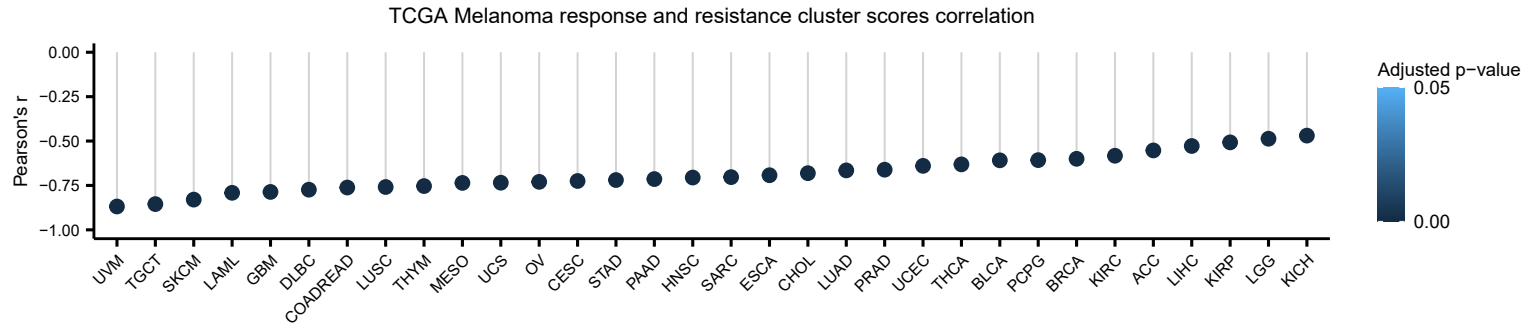

Supplement: Supplementary file 1 [file 41458396]
